# Supplementary material for: Oxygen migration performance of LaFeO3 perovskite-type oxygen carriers with Sr doping
Source: Royal Society of Chemistry journal article supplement (doi:10.1039/d2cp05129j), 2023-01-01

---

## Supporting Information

Oxygen migration performance of LaFeO<sub>3</sub> perovskite-type oxygen carrier with Sr doping

Yuan Feng<sup>a</sup>, Hanyu Jin<sup>a</sup>, Shuai Wang<sup>a\*</sup>

<sup>a</sup> School of Energy Science and Engineering, Harbin Institute of Technology, Harbin, 150001, China

\* Corresponding author.

E-mail address: [shuaiwang@hit.edu.cn](mailto:shuaiwang@hit.edu.cn)

Figure S1 Oxygen vacancy formation energy of a 13-layer LaFeO<sub>3</sub> system (ref. bulk value: oxygen vacancy formation energy obtained using the same method from the bulk model)

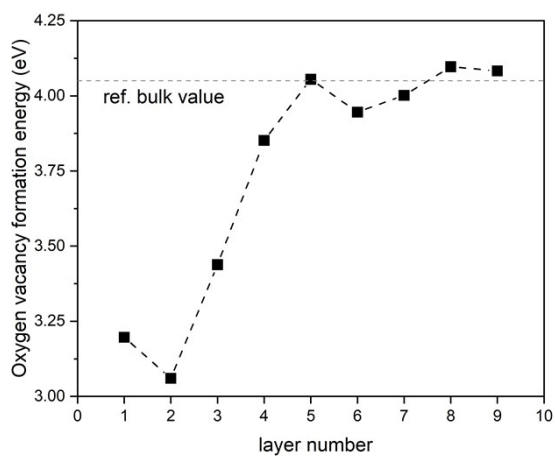

Figure S2 Oxygen migration barrier of a 13-layer LaFeO<sub>3</sub> system

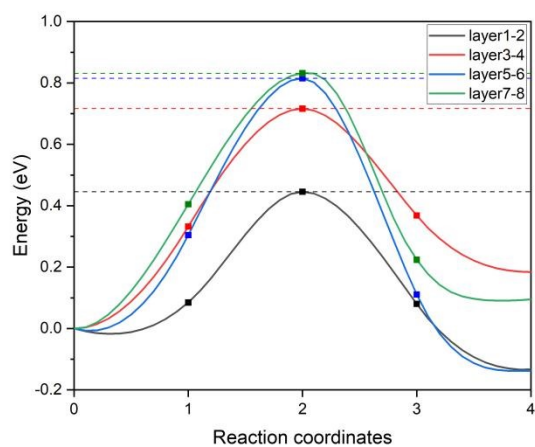

Figure S3 Comparison of oxygen migration barriers from high site and low site at the layer 1-2 process

(a), the layer 3-4 process (b) in the undoped LaFeO<sub>3</sub> system

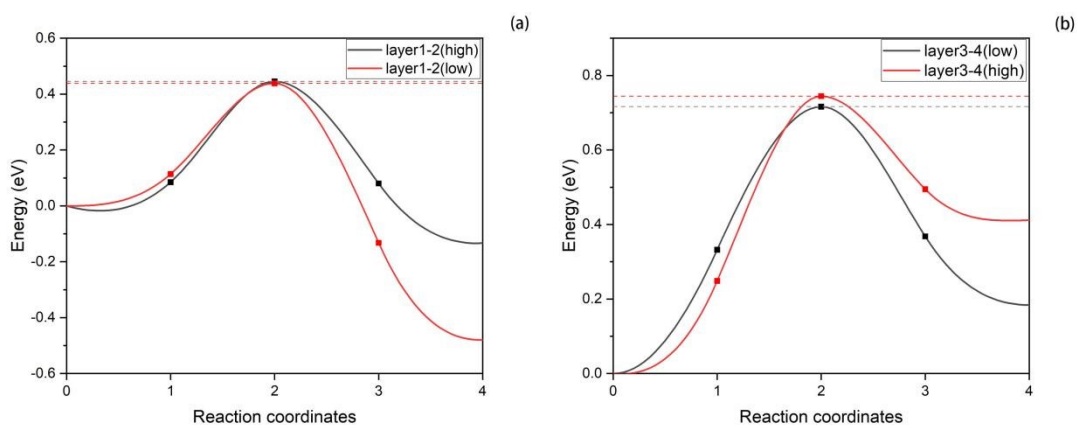

Figure S4 Oxygen migration barrier at the asymmetric location of the 50% Sr doped system from the path away from Sr atom (a) and near Sr atom (b)

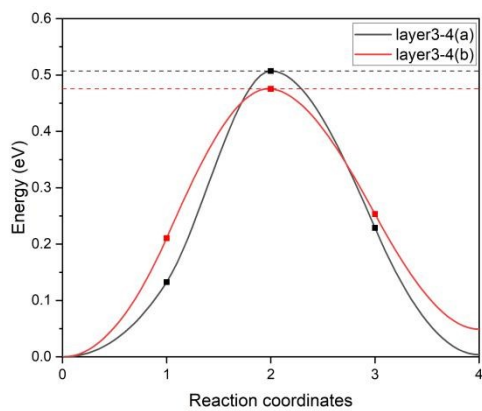

Figure S5 Oxygen migration barrier through A-site atoms in the 50% Sr doped system

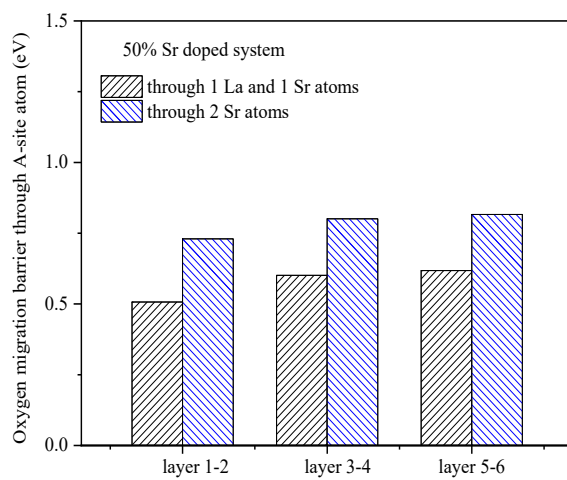

Supplement: d2cp05129j1.pdf [file d2cp05129j1.pdf]
